# Supplementary material for: Discrimination of Stressed and Non-Stressed Food-Related Bacteria Using Raman-Microspectroscopy
Source: MDPI journal article supplement (doi:10.3390/foods11101506), 2022-05-22
Supplement: s1 [file s1]

## Supplementary material

**Table 1.** Scheme for data splitting for trained and tested microorganisms. Each data set's storage time is specified in days. Test data are highlighted in green.

| Data set               | 25 °C |   |    | Dessicator |    |    | Cold sampling |    |    | HCl |    |    | Heat dried |    |    | 2-propanol |    |    | NaOH |   |   | Regular |    |    |
|------------------------|-------|---|----|------------|----|----|---------------|----|----|-----|----|----|------------|----|----|------------|----|----|------|---|---|---------|----|----|
|                        | 1     | 2 | 3  | 1          | 2  | 3  | 1             | 2  | 3  | 1   | 2  | 3  | 1          | 2  | 3  | 1          | 2  | 3  | 1    | 2 | 3 | 1       | 2  | 3  |
| <i>B. sub</i>          | 1     | 2 | 3  | 8          | 9  | 10 | 8             | 12 | 14 | 3   | 9  | 14 | 7          | 9  | 10 | 1          | 9  | 15 | 1    | 6 | 7 | 4       | 6  | 8  |
| <i>B. therm</i>        | 4     | 9 | 1  | 9          | 15 | 1  | 3             | 7  | 20 | 9   | 10 | 14 | 8          | 14 | 16 | 10         | 11 | 15 | 2    | 7 | 8 | 5       | 7  | 15 |
| <i>B. tii</i>          | 1     | 9 | 1  | 8          | 9  | 10 | 11            | 12 | 3  | 7   | 8  | 9  | 7          | 9  | 10 | 2          | 8  | 15 | 6    | 7 | 8 | 5       | 6  | 8  |
| <i>E. coli</i> K12     | 4     | 9 | 1  | 9          | 15 | 1  | 3             | 7  | 20 | 6   | 9  | 14 | 8          | 14 | 16 | 2          | 9  | 15 | 2    | 7 | 8 | 21      | 5  | 12 |
| <i>E. coli</i> HB101   | 11    | 9 | 1  | 9          | 10 | 1  | 3             | 15 | 7  | 6   | 8  | 14 | 8          | 9  | 11 | 2          | 9  | 16 | 3    | 6 | 7 | 21      | 1  | 7  |
| <i>M. luteus</i>       | 8     | 2 | 13 | 18         | 10 | 16 | 3             | 11 | 15 | 3   | 9  | 14 | 8          | 9  | 11 | 1          | 9  | 15 | 1    | 6 | 7 | 21      | 18 | 7  |
| <i>Ps. fluor</i> 4358  | 1     | 8 | 1  | 9          | 15 | 1  | 3             | 16 | 20 | 6   | 8  | 14 | 8          | 14 | 16 | 2          | 9  | 15 | 6    | 6 | 7 | 12      | 5  | 18 |
| <i>Ps. fluor</i> 50090 | 8     | 4 | 1  | 9          | 15 | 1  | 3             | 11 | 23 | 6   | 9  | 14 | 8          | 14 | 16 | 1          | 8  | 16 | 6    | 6 | 7 | 5       | 21 | 12 |
| <i>E. coli</i> TOP10   | 1     | 9 | 1  | 15         | 15 | 1  | 16            | 20 | 7  | 8   | 9  | 14 | 17         | 14 | 16 | 2          | 8  | 15 | 2    | 7 | 8 | 1       | 5  | 12 |

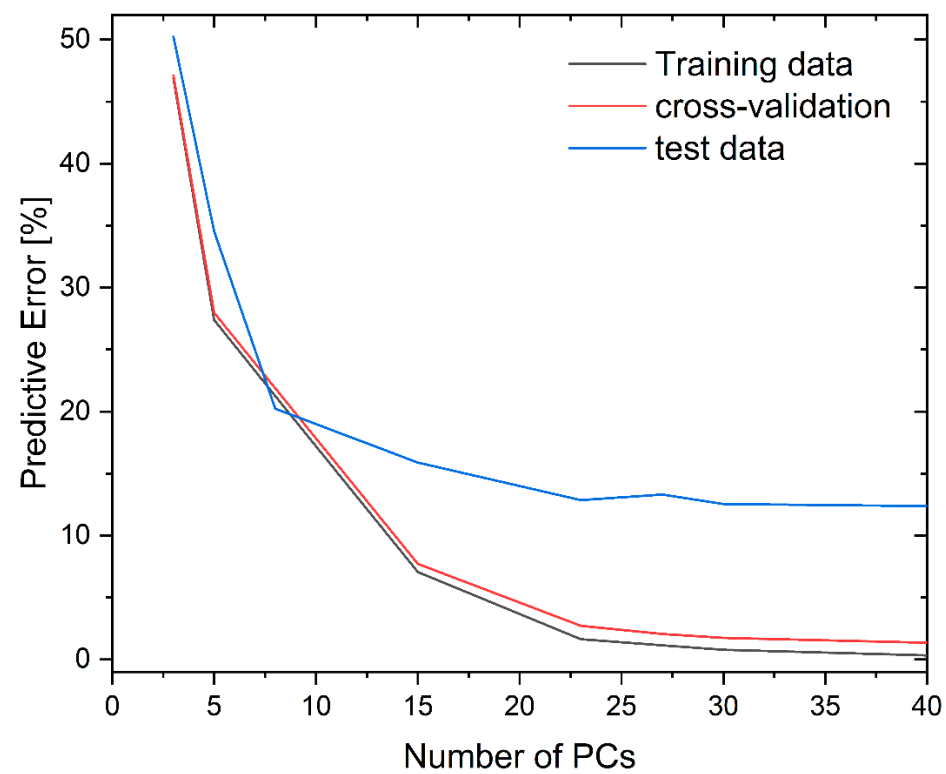

**Figure S1.** Check for Overfitting.
